# Supplementary material for: Bone mineral density and vertebral fractures in patients with systemic lupus erythematosus: A systematic review and meta-regression
Source: PubMed Central journal article supplement (PMC5999233; doi:10.1371/journal.pone.0196113), 2018-06-13
Supplement: pone.0196113.s006.pdf [file pone.0196113.s006.pdf]

## S1 Table

The following Medical Subject Heading (MeSH) terms were implemented in PubMed database:

- "Lupus Erythematosus, Systemic"
- "Osteoporosis"
- "Bone Density"
- "Densitometry"
- "Spinal Fractures"

We applied the following Boolean operators to develop the search: "AND" and "OR" retrieving different MeSH Heading/Subheading Combination

The following combinations and the corresponding number of studies were retrieved:

- (((("Lupus Erythematosus, Systemic"[Mesh]) AND "Osteoporosis"[Mesh]) OR "Bone Density"[Mesh]) OR "Densitometry"[Mesh]) OR "Spinal Fractures"[Mesh] = 77816
- (("Lupus Erythematosus, Systemic"[Mesh]) AND "Osteoporosis"[Mesh]) OR "Bone Density"[Mesh] = 47576
- (((("Lupus Erythematosus, Systemic"[Mesh]) AND "Osteoporosis"[Mesh]) AND "Bone Density"[Mesh]) OR "Densitometry"[Mesh]) OR "Spinal Fractures"[Mesh] = 44429
- (((("Lupus Erythematosus, Systemic"[Mesh]) AND "Osteoporosis"[Mesh]) AND "Bone Density"[Mesh]) OR "Densitometry"[Mesh]) = 32167
- (((("Lupus Erythematosus, Systemic"[Mesh]) AND "Osteoporosis"[Mesh]) OR "Bone Density"[Mesh]) OR "Densitometry"[Mesh]) = 66812
- (((("Lupus Erythematosus, Systemic"[Mesh]) AND "Osteoporosis"[Mesh]) OR "Bone Density"[Mesh]) AND "Densitometry"[Mesh]) = 12875

We consider the last Boolean and MeSH terms search had the best performance.

The following steps in the systematic review are detailed in Figure 1. (Flow diagram detailing the literature search)
