# Supplementary material for: Bone mineral density and vertebral fractures in patients with systemic lupus erythematosus: A systematic review and meta-regression
Source: PubMed Central journal article supplement (PMC5999233; doi:10.1371/journal.pone.0196113), 2018-06-13
Supplement: pone.0196113.s007.pdf [file pone.0196113.s007.pdf]

1 **S2 Table**

2

|                    | Without GCT                                                                    | With GCT                                                                                |
|--------------------|--------------------------------------------------------------------------------|-----------------------------------------------------------------------------------------|
| Dhillon 1990       | Never user 10                                                                  | At least 10 mg a day for at least 6 months 12                                           |
| Kalla 1993         | Current user but had only begun such treatment within the previous 6 months 24 | Current corticosteroid for longer than 6 months prior study 22                          |
| Pons 1995          | Never user 15                                                                  | Ever user 28                                                                            |
| Kipen 1997         | Never user 28                                                                  | Ever user 69                                                                            |
| Teichman 1999      | Never user 20                                                                  | Ever user 35                                                                            |
| Gilboe 2000        | Never user 7                                                                   | Ever user 68                                                                            |
| Bhattoa 2001       | Current no-user 5                                                              | Current daily steroid dose > 7.5 mg/day 8<br>Current daily steroid dose ≤ 7.5 mg/day 10 |
| Boyanov 2003       | Never user 16                                                                  | Ever user 32                                                                            |
| Uarantanawong 2003 | Never user 44                                                                  | Ever user 74                                                                            |
| Sun 2015           | Never user 119                                                                 | Ever user 0                                                                             |
| Guo 2017           | Never user 60                                                                  | Ever user 0                                                                             |

3

4

5

6

7

8

9

10

11

12

13

14

15

16
